# Supplementary material for: Phonon-modulated upconversion luminescence properties in some Er3+ and Yb3+ co-activated oxides
Source: Royal Society of Chemistry journal article supplement (doi:10.1039/c4tc00330f), 2014-01-01
Supplement: c4tc00330f1.pdf [file c4tc00330f1.pdf]

## Supporting Information

### **Phonon-Modulated Upconversion Luminescence Properties in Some Er<sup>3+</sup> and Yb<sup>3+</sup> Co-activated Oxides**

Yunfeng Wang<sup>†‡</sup>, Wen Xu<sup>†</sup>, Yongsheng Zhu<sup>† ‡</sup>, Sai Xu<sup>†</sup>, Haining Cui<sup>‡</sup>, Hongwei Song<sup>\*†</sup>

<sup>†</sup>State Key Laboratory on Integrated Optoelectronics, College of Electronic Science and Engineering, Jilin University, 2699 Qianjin Street, Changchun 130012, China

<sup>‡</sup>College of Physics, Jilin University, 2699 Qianjin Street, Changchun 130012, China

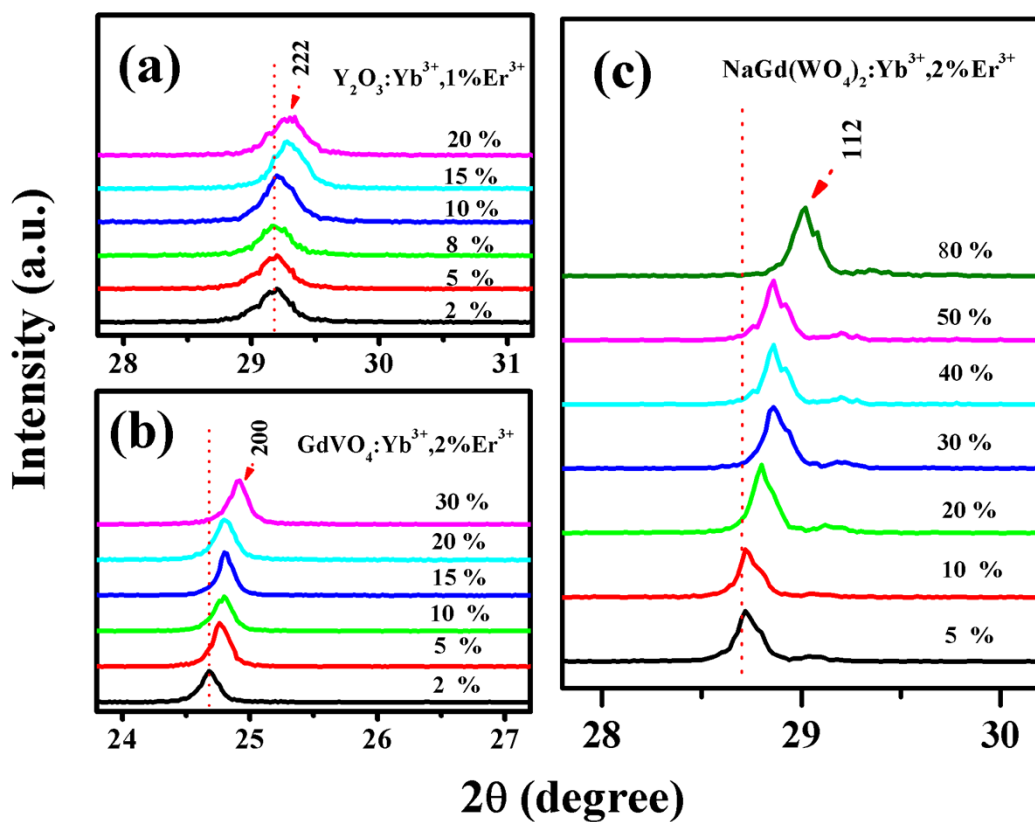

**Figure S1:** The magnified XRD patterns of (a) Y<sub>2</sub>O<sub>3</sub> : Yb<sup>3+</sup>/1% Er<sup>3+</sup>, (b) GdVO<sub>4</sub> : Yb<sup>3+</sup>/2% Er<sup>3+</sup> and (c) NaGd(WO<sub>4</sub>)<sub>2</sub> : Yb<sup>3+</sup>/2%Er<sup>3+</sup> samples at the corresponding peak position (222),(200),and (112), respectively, with different Yb<sup>3+</sup> doped concentrations.

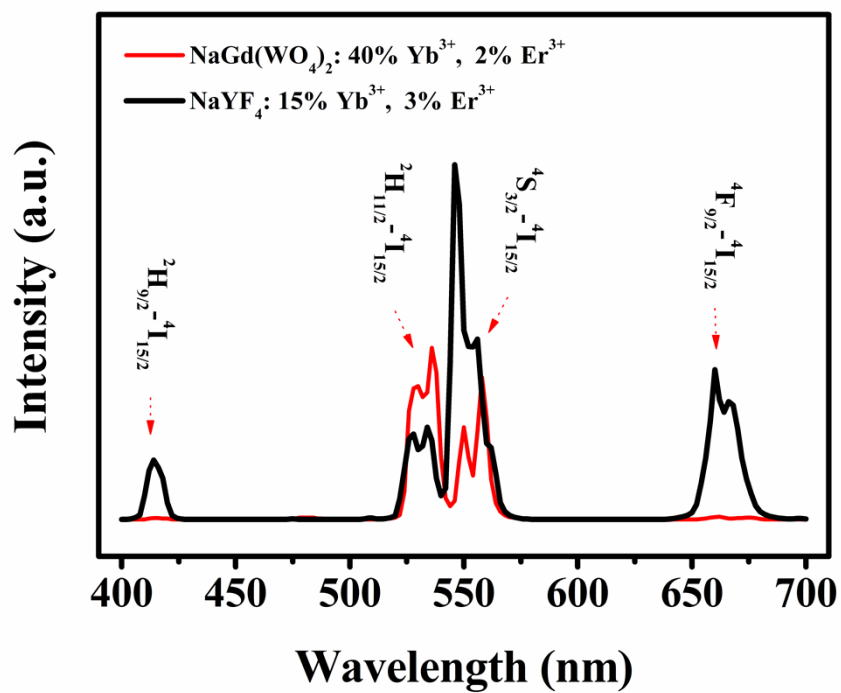

**Figure S2:** The typical UCL spectra of NaGd(WO<sub>4</sub>)<sub>2</sub>: 40% Yb<sup>3+</sup>/2% Er<sup>3+</sup> and NaYF<sub>4</sub>: 15% Yb<sup>3+</sup>/3% Er<sup>3+</sup> Commercial phosphor.

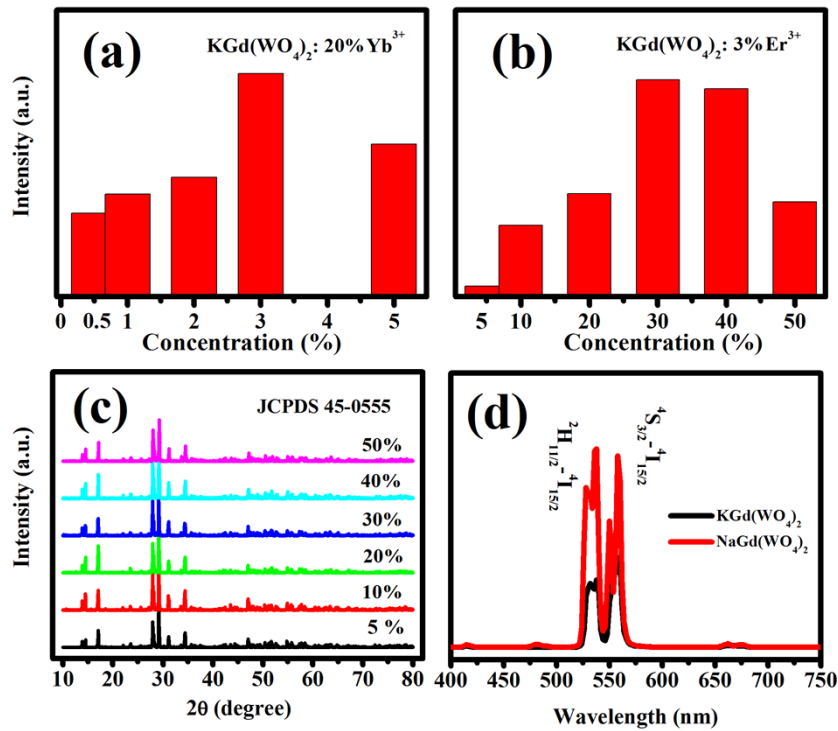

**Figure S3:** (a) The histogram of the integrated UCL intensity of  $\text{Er}^{3+}$  concentration-dependent UCL spectra of  $\text{KGd}(\text{WO}_4)_2 : 20\% \text{Yb}^{3+} / \text{Er}^{3+}$  and (b)  $\text{Yb}^{3+}$  concentration-dependent UCL spectra of  $\text{KGd}(\text{WO}_4)_2 : \text{Yb}^{3+} / 3\% \text{Er}^{3+}$ . (c)  $\text{Yb}^{3+}$  concentration-dependent XRD patterns of  $\text{KGd}(\text{WO}_4)_2 : \text{Yb}^{3+} / 3\% \text{Er}^{3+}$ . (d) The typical UCL spectra of  $\text{NaGd}(\text{WO}_4)_2 : 40\% \text{Yb}^{3+} / 2\% \text{Er}^{3+}$  and  $\text{KGd}(\text{WO}_4)_2 : 30\% \text{Yb}^{3+} / 3\% \text{Er}^{3+}$ .
